# Supplementary material
Source: HighWire-hosted journal article supplement (https://openres.ersjournals.com/content/9/3/00168-2023)
Supplement: inline-supplementary-material-1 [file inline-supplementary-material-1.pdf]

Supplementary material

## **Validation of the qSOFA and CRB-65 in SARS-CoV-2 infected community-acquired pneumonia**

Tina Richter, Falko Tesch, Jochen Schmitt, Dirk Koschel, Martin Kolditz

Online supplementary material

**Table S1.** Comparison of characteristics in SARS-CoV-2 positive and negative CAP (community-acquired pneumonia) cases in the main cohort (after excluding unclear COVID status, transferred to another hospital and invasively ventilation on admission). Median together with the first and third quartiles (Q1, Q3) and absolute and relative frequencies (N, %), respectively, are provided. For the comparison of the two subgroups, p-values from the Mann-Whitney-U-test and Fisher's exact test, respectively, are provided. \* all p-value < 0,001

| <b>Characteristic</b>                                                                   | <b>SARS-CoV-2 positive CAP<br/>(N= 68,594)</b> | <b>SARS-CoV-2 negative CAP<br/>(N= 167,880)</b> |
|-----------------------------------------------------------------------------------------|------------------------------------------------|-------------------------------------------------|
| hospital mortality; N (%)                                                               | 15,540 (22.7%)*                                | 26,309 (15.7%)*                                 |
| ventilation rate; N (%)                                                                 | 10,198 (14.9%)*                                | 15,587 (9.2%)*                                  |
| age, in years; median (Q1, Q3)                                                          | 72 (57, 82)*                                   | 78 (66, 85)*                                    |
| males; N (%)                                                                            | 38,926 (56.7%)*                                | 98,207 (58.5%)*                                 |
| respiratory rate at admission, in breaths/min; median (Q1, Q3)                          | 19 (16, 23)*                                   | 19 (16, 23)*                                    |
| pneumonia-associated confusion; N (%)                                                   | 4141 (16.0%)*                                  | 13,631 (8.1%)*                                  |
| systolic blood pressure, in mmHg; median (Q1, Q3)                                       | 131 (120, 148)*                                | 130 (115, 150)*                                 |
| diastolic blood pressure, in mmHg; median (Q1, Q3)                                      | 78 (70, 85)*                                   | 75 (65, 85)*                                    |
| chronically bedridden; N (%)                                                            | 6708 (9.8%)*                                   | 30,837 (18.4%)*                                 |
| admission from nursing home; N (%)                                                      | 11,454 (16.7%)*                                | 37,730 (22.5%)*                                 |
| palliative treatment goal; N (%)                                                        | 10,037 (14.6%)*                                | 22,076 (13.1%)*                                 |
| <b>CRB-65 score; median (Q1, Q3)</b>                                                    | 1 (0, 1)*                                      | 1 (1, 2)*                                       |
| <b>CRB score; median (Q1, Q3)</b>                                                       | 0 (0, 0)*                                      | 0 (0, 1)*                                       |
| itemized:                                                                               |                                                |                                                 |
| confusion (C); N (%)                                                                    | 4141 (16.0%)*                                  | 13,631 (8.1%)*                                  |
| respiratory rate at admission $\geq$ 30 breaths/min (R ); N (%)                         | 5538 (8.1%)*                                   | 13,416 (8.0%)*                                  |
| systolic blood pressure < 90 mmHg or diastolic blood pressure $\leq$ 60 mmHg (B); N (%) | 9638 (14.1%)*                                  | 33,169 (19.8%)*                                 |
| age $\geq$ 65; N (%)                                                                    | 42,238 (61.6%)*                                | 129,433 (77.1%)*                                |
| <b>qSOFA-65 score; median (Q1, Q3)</b>                                                  | 1 (0, 2)*                                      | 1 (1, 2)*                                       |
| <b>qSOFA Score; median (Q1, Q3)</b>                                                     | 0 (0, 0)*                                      | 0 (0, 0)*                                       |
| itemized (for items different from CRB-65):                                             |                                                |                                                 |
| respiratory rate at admission $\geq$ 22 breaths/min; N (%)                              | 22,178 (32.3%)*                                | 53,631 (31.9%)*                                 |
| systolic blood pressure $\leq$ 100 mmHg; N (%)                                          | 4715 (6.9%)*                                   | 18,839 (11.2%)*                                 |

**Table S2.** Characteristics of SARS-CoV-2 positive reduced cohort 1 (after excluding patients with chronically bedridden, admission from nursing home and palliative treatment goal). Median together with the first and third quartiles (Q1, Q3) and absolute and relative frequencies (N, %) are provided. For the comparison of the subgroups, p-values from the Fisher’s exact test or the Mann-Whitney-U-Test are provided. \* p-value < 0,001; \*\* p-value < 0,5

| <b>Characteristic</b>                                                              | <b>SARS-CoV-2 pos. mortality</b> | <b>SARS-CoV-2 pos. survivors</b> | <b>SARS-CoV-2 pos. mechanical ventilation</b> | <b>SARS-CoV-2 pos. non-ventilated</b> | <b>SARS-CoV-2 pos. mortality and/ or mechanical ventilation</b> | <b>SARS-CoV-2 pos. survivor and non-ventilated</b> |
|------------------------------------------------------------------------------------|----------------------------------|----------------------------------|-----------------------------------------------|---------------------------------------|-----------------------------------------------------------------|----------------------------------------------------|
|                                                                                    | <b>(N= 4,512)</b>                | <b>(N= 46,503)</b>               | <b>(N= 7,119)</b>                             | <b>(N= 43,896)</b>                    | <b>(N= 9,135)</b>                                               | <b>(N= 41,880)</b>                                 |
| age, in years; median (Q1, Q3)                                                     | 80 (72, 85)*                     | 63 (52, 76)*                     | 68 (57, 78)*                                  | 64 (52, 77)*                          | 73 (60, 81)*                                                    | 63 (52, 76)*                                       |
| males; N (%)                                                                       | 2,999 (66.5%)*                   | 27,167 (58.4%)*                  | 4,864 (68.3%)*                                | 25,302 (57.6%)*                       | 6,107 (66.9%)*                                                  | 24,059 (57.4%)*                                    |
| respiratory rate at admission, in breaths/min; median (Q1, Q3)                     | 21 (18, 26)*                     | 18 (16, 22)*                     | 21 (18, 26)*                                  | 18 (16, 22)*                          | 21 (18, 26)*                                                    | 18 (16, 22)*                                       |
| pneumonia-associated confusion; N (%)                                              | 582 (12.9%)*                     | 1,329 (2.9%)*                    | 615 (8.6%)*                                   | 1,296 (3.0%)*                         | 877 (9.6%)*                                                     | 1,034 (2.5%)*                                      |
| systolic blood pressure, in mmHg; median (Q1, Q3)                                  | 132 (117, 150)                   | 132 (120, 147)                   | 133 (120, 150)**                              | 132 (120, 147)**                      | 133 (120, 150)**                                                | 132 (120, 147)**                                   |
| diastolic blood pressure, in mmHg; median (Q1, Q3)                                 | 74 (64, 82)*                     | 80 (70,86)*                      | 77 (68, 85)*                                  | 80 (70, 85)*                          | 76 (67, 84)*                                                    | 80 (70, 86)*                                       |
| <b>CRB-65 score; median (Q1, Q3)</b>                                               | 1 (1, 2)*                        | 1 (0, 1)*                        | 1 (0, 1)*                                     | 1 (0, 1)*                             | 1 (1, 2)*                                                       | 1 (0, 1)*                                          |
| <b>CRB score; median (Q1, Q3)</b>                                                  | 0 (0, 1)*                        | 0 (0, 0)*                        | 0 (0, 1)*                                     | 0 (0, 0)*                             | 0 (0, 1)*                                                       | 0 (0, 0)*                                          |
| itemized:                                                                          |                                  |                                  |                                               |                                       |                                                                 |                                                    |
| confusion (C); N (%)                                                               | 582 (12.9%)*                     | 1,329 (2.9%)*                    | 615 (8.6%)*                                   | 1,296 (3.0%)*                         | 877 (9.6%)*                                                     | 1,034 (2.5%)*                                      |
| respiratory rate at admission ≥ 30 breaths/min (R); N (%)                          | 738 (16.4%)*                     | 2,545 (5.5%)*                    | 1,225 (17.2%)*                                | 2,058 (4.7%)*                         | 1,447 (15.8%)*                                                  | 1,836 (4.4%)*                                      |
| systolic blood pressure < 90 mmHg or diastolic blood pressure ≤ 60 mmHg (B); N (%) | 981 (21.7%)*                     | 4,505 (9.7%)*                    | 1,150 (16.2%)*                                | 4336 (9.9%)*                          | 1,568 (17.2%)*                                                  | 3,918 (9.4%)*                                      |
| age ≥ 65; N (%)                                                                    | 3,994 (88.5%)*                   | 21,617 (46.5%)*                  | 4,142 (58.2%)*                                | 21,469 (48.9%)*                       | 6,086 (66.6%)*                                                  | 19,525 (46.6%)*                                    |
| <b>qSOFA-65 score; median (Q1, Q3)</b>                                             | 2 (1, 2)*                        | 1 (0, 1)*                        | 1 (1, 2)*                                     | 1 (0, 1)*                             | 1 (1, 2)*                                                       | 1 (0, 1)*                                          |
| <b>qSOFA Score; median (Q1, Q3)</b>                                                | 1 (0, 1)*                        | 0 (0, 1)*                        | 1 (0, 1)*                                     | 0 (0, 1)*                             | 1 (0, 1)*                                                       | 0 (0, 1)*                                          |
| itemized (for items different from CRB-65):                                        |                                  |                                  |                                               |                                       |                                                                 |                                                    |
| respiratory rate at admission ≥ 22 breaths/min; N (%)                              | 2,108 (46.7%)*                   | 12,780 (27.5%)*                  | 3,437 (48.3%)*                                | 11,451 (26.1%)*                       | 4,200 (46.0%)*                                                  | 10,688 (25.5%)*                                    |
| systolic blood pressure ≤ 100 mmHg; N (%)                                          | 471 (10.4%)*                     | 1,886 (4.1%)*                    | 496 (7.0%)*                                   | 1861 (4.2%)*                          | 722 (7.9%)*                                                     | 1635 (3.9%)*                                       |

**Table S3.** Characteristics of SARS-CoV-2 negative reduced cohort 1 (after excluding patients with chronically bedridden, admission from nursing home and palliative treatment goal). Median together with the first and third quartiles (Q1, Q3) and absolute and relative frequencies (N, %) are provided. For the comparison of the subgroups, p-values from the Fisher’s exact test or the Mann-Whitney-U-Test are provided. \* p-value < 0,001

| Characteristic                                                                     | SARS-CoV-2 neg. mortality<br>(N= 6,766) | SARS-CoV-2 neg. survivors<br>(N= 104,271) | SARS-CoV-2 neg. mechanical ventilation<br>(N= 9,214) | SARS-CoV-2 neg. non-ventilated<br>(N= 101,823) | SARS-CoV-2 neg. mortality and/ or mechanical ventilation<br>(N= 13,339) | SARS-CoV-2 neg. survivors and non-ventilated<br>(N= 97,698) |
|------------------------------------------------------------------------------------|-----------------------------------------|-------------------------------------------|------------------------------------------------------|------------------------------------------------|-------------------------------------------------------------------------|-------------------------------------------------------------|
| age, in years; median (Q1, Q3)                                                     | 80 (72, 86)*                            | 74 (61, 82)*                              | 72 (62, 82)*                                         | 75 (62, 83)*                                   | 76 (66, 83)*                                                            | 75 (61, 82)*                                                |
| males; N (%)                                                                       | 4,419 (65.3%)*                          | 61,980 (59.4%)*                           | 5,776 (62.7%)*                                       | 60,623 (59.5%)*                                | 8,404 (63.0%)*                                                          | 57,995 (59.4%)*                                             |
| respiratory rate at admission, in breaths/min; median (Q1, Q3)                     | 20 (17, 25)*                            | 18 (16, 22)*                              | 22 (18, 27)*                                         | 18 (16, 22)*                                   | 21 (17, 26)*                                                            | 18 (16, 22)*                                                |
| pneumonia-associated confusion; N (%)                                              | 1,128 (16.7%)*                          | 5,209 (5.0%)*                             | 1,484 (16.1%)*                                       | 4,853 (4.8%)*                                  | 2,057 (15.4%)*                                                          | 4,280 (4.4%)*                                               |
| systolic blood pressure, in mmHg; median (Q1, Q3)                                  | 125 (106, 144)*                         | 135 (120, 150)*                           | 130 (110, 150)*                                      | 135 (120, 150)*                                | 130 (110, 149)*                                                         | 135 (120, 150)*                                             |
| diastolic blood pressure, in mmHg; median (Q1, Q3)                                 | 70 (60, 80)*                            | 77 (68, 85)*                              | 74 (62, 85)*                                         | 77 (68, 85)*                                   | 73 (60, 84)*                                                            | 78 (69, 85)*                                                |
| <b>CRB-65 score; median (Q1, Q3)</b>                                               | 1 (1, 2)*                               | 1 (0, 1)*                                 | 1 (1, 2)*                                            | 1 (1, 1)*                                      | 1 (1, 2)*                                                               | 1 (0, 1)*                                                   |
| <b>CRB score; median (Q1, Q3)</b>                                                  | 0 (0, 1)*                               | 0 (0, 0)*                                 | 0 (0, 1)*                                            | 0 (0, 0)*                                      | 0 (0, 1)*                                                               | 0 (0, 0)*                                                   |
| itemized:                                                                          |                                         |                                           |                                                      |                                                |                                                                         |                                                             |
| confusion (C); N (%)                                                               | 1,128 (16.7%)*                          | 5,209 (5.0%)*                             | 1,484 (16.1%)*                                       | 4,853 (4.8%)*                                  | 2,057 (15.4%)*                                                          | 4,280 (4.4%)*                                               |
| respiratory rate at admission ≥ 30 breaths/min (R); N (%)                          | 984 (14.5%)*                            | 57,60 (5.5%)*                             | 1,655 (18.0%)*                                       | 5,089 (5.0%)*                                  | 2,093 (15.7%)*                                                          | 4,651 (4.8%)*                                               |
| systolic blood pressure < 90 mmHg or diastolic blood pressure ≤ 60 mmHg (B); N (%) | 2,046 (30.2%)*                          | 15,482 (14.8%)*                           | 2,263 (24.6%)*                                       | 15,265 (15.0%)*                                | 3,425 (25.7%)*                                                          | 14,103 (14.4%)*                                             |
| age ≥ 65; N (%)                                                                    | 5,919 (87.5%)*                          | 72,722 (69.7%)*                           | 6,380 (69.2%)*                                       | 72,261 (71.0%)*                                | 10,242 (76.8%)*                                                         | 68,399 (70.0%)*                                             |
| <b>qSOFA-65 score; median (Q1, Q3)</b>                                             | 2 (1, 2)*                               | 1 (1, 2)*                                 | 1 (1, 2)*                                            | 1 (1, 2)*                                      | 1 (1, 2)*                                                               | 1 (1, 2)*                                                   |
| <b>qSOFA Score; median (Q1, Q3)</b>                                                | 1 (0, 1)*                               | 0 (0, 1)*                                 | 1 (0, 1)*                                            | 0 (0, 1)*                                      | 1 (0, 1)*                                                               | 0 (0, 1)*                                                   |
| itemized (for items different from CRB-65):                                        |                                         |                                           |                                                      |                                                |                                                                         |                                                             |
| respiratory rate at admission ≥ 22 breaths/min; N (%)                              | 2,940 (43.5%)*                          | 28,832 (27.7%)*                           | 4,489 (48.7%)*                                       | 27,283 (26.8%)*                                | 6,083 (45.6%)*                                                          | 25,689 (26.3%)*                                             |
| systolic blood pressure ≤ 100 mmHg; N (%)                                          | 1,421 (21.0%)*                          | 7,152 (6.9%)*                             | 1,463 (15.9%)*                                       | 7,110 (7.0%)*                                  | 2,249 (16.9%)*                                                          | 6,324 (6.5%)*                                               |

**Table S4.** Characteristics of SARS-CoV-2 negative CAP cohort. Median together with the first and third quartiles (Q1, Q3) and absolute and relative frequencies (N, %) are provided. For the comparison of the subgroups, p-values from the Fisher's exact test or the Mann-Whitney-U-Test are provided. \*all p-value < 0,001

| Characteristic                                                                     | SARS-CoV-2 neg. mortality | SARS-CoV-2 neg. survivors | SARS-CoV-2 neg. mechanical ventilation | SARS-CoV-2 neg. non-ventilated | SARS-CoV-2 neg. mortality and/ or mechanical ventilation | SARS-CoV-2 neg. survivors and non-ventilated |
|------------------------------------------------------------------------------------|---------------------------|---------------------------|----------------------------------------|--------------------------------|----------------------------------------------------------|----------------------------------------------|
|                                                                                    | (N= 26,309)               | (N= 141,571)              | (N= 15,587)                            | (N= 152,293)                   | (N= 35,158)                                              | (N= 132,722)                                 |
| age, in years; median (Q1, Q3)                                                     | 82 (76, 88)*              | 77 (64, 84)*              | 75 (64, 82)*                           | 78 (66, 85)*                   | 81 (71, 87)*                                             | 77 (64, 84)*                                 |
| males; N (%)                                                                       | 15721 (59.8%)*            | 82486 (58.3%)*            | 9717 (62.3%)*                          | 88490 (58.1%)*                 | 21079 (60.0%)*                                           | 77128 (58.1%)*                               |
| respiratory rate at admission, in breaths/min; median (Q1, Q3)                     | 21 (17, 26)*              | 18 (16, 22)*              | 22 (18, 28)*                           | 18 (16, 22)*                   | 21 (17, 26)*                                             | 18 (16, 22)*                                 |
| pneumonia-associated confusion; N (%)                                              | 4930 (18.7%)*             | 8701 (6.1%)*              | 2928 (18.8%)*                          | 10703 (7.0%)*                  | 6264 (17.8%)*                                            | 7367 (5.6%)*                                 |
| systolic blood pressure, in mmHg; median (Q1, Q3)                                  | 120 (102, 140)*           | 133 (118, 150)*           | 128 (110, 147)*                        | 130 (116, 150)*                | 123 (105, 144)*                                          | 133 (119, 150)*                              |
| diastolic blood pressure, in mmHg; median (Q1, Q3)                                 | 70 (60, 80)*              | 76 (66, 85)*              | 71 (60, 83)*                           | 75 (65, 85)*                   | 70 (60, 81)*                                             | 76 (67, 85)*                                 |
| chronically bedridden; N (%)                                                       | 9799 (37.2%)*             | 21038 (14.9%)*            | 2543 (16.3%)*                          | 28294 (18.6%)*                 | 11101 (31.6%)*                                           | 19736 (14.9%)*                               |
| admission from nursing home; N (%)                                                 | 10012 (38.1%)*            | 27718 (19.6%)*            | 2802 (18.0%)*                          | 34928 (22.9%)*                 | 11457 (32.6%)*                                           | 26273 (19.8%)*                               |
| palliative treatment goal; N (%)                                                   | 14527 (55.2%)*            | 7549 (5.3%)*              | 3936 (25.3%)*                          | 18140 (11.9%)*                 | 15092 (42.9%)*                                           | 6984 (5.3%)*                                 |
| <b>CRB-65 score; median (Q1, Q3)</b>                                               | 1 (1, 2)*                 | 1 (1, 1)*                 | 1 (1, 2)*                              | 1 (1, 1)*                      | 1 (1, 2)*                                                | 1 (1, 1)*                                    |
| <b>CRB score; median (Q1, Q3)</b>                                                  | 1 (0, 1)*                 | 0 (0, 1)*                 | 0 (0, 1)*                              | 0 (0, 1)*                      | 0 (0, 1)*                                                | 0 (0, 1)*                                    |
| itemized:                                                                          |                           |                           |                                        |                                |                                                          |                                              |
| confusion (C); N (%)                                                               | 4930 (18.7%)*             | 8701 (6.1%)*              | 2928 (18.8%)*                          | 10703 (7.0%)*                  | 6264 (17.8%)*                                            | 7367 (5.6%)*                                 |
| respiratory rate at admission ≥ 30 breaths/min (R ); N (%)                         | 4327 (16.4%)*             | 9089 (6.4%)*              | 3016 (19.3%)*                          | 10400 (6.8%)*                  | 5878 (16.7%)*                                            | 7538 (5.7%)*                                 |
| systolic blood pressure < 90 mmHg or diastolic blood pressure ≤ 60 mmHg (B); N (%) | 8691 (33.0%)*             | 24478 (17.3%)*            | 4420 (28.4%)*                          | 28749 (18.9%)*                 | 10731 (30.5%)*                                           | 22438 (16.9%)*                               |
| age ≥ 65; N (%)                                                                    | 24138 (91.7%)*            | 105295 (74.4%)*           | 11599 (74.4%)*                         | 117834 (77.4%)*                | 30135 (85.7%)*                                           | 99298 (74.8%)*                               |
| <b>qSOFA-65 score; median (Q1, Q3)</b>                                             | 2 (1, 2)*                 | 1 (1, 2)*                 | 2 (1, 2)*                              | 1 (1, 2)*                      | 2 (1, 2)*                                                | 1 (1, 2)*                                    |
| <b>qSOFA Score; median (Q1, Q3)</b>                                                | 1 (0, 1)*                 | 0 (0, 1)*                 | 1 (0, 1)*                              | 0 (0, 1)*                      | 1 (0, 1)*                                                | 0 (0, 1)*                                    |
| itemized (for items different from CRB-65):                                        |                           |                           |                                        |                                |                                                          |                                              |
| respiratory rate at admission ≥ 22 breaths/min; N (%)                              | 12210 (46.4%)*            | 41421 (29.3%)*            | 7778 (49.9%)*                          | 45853 (30.1%)*                 | 16475 (46.9%)*                                           | 37156 (28.0%)*                               |
| systolic blood pressure ≤ 100 mmHg; N (%)                                          | 6380 (24.3%)*             | 12459 (8.8%)*             | 2992 (19.2%)*                          | 15847 (10.4%)*                 | 7654 (21.8%)*                                            | 11185 (8.4%)*                                |

**Figure S1.** Bar charts of risk scores in relation to single (hospital mortality, mechanical ventilation) and combined endpoints (hospital mortality and/ or mechanical ventilation). The percentage of patients with corresponding score values is shown. Red for the SARS-CoV-2 positive patients and blue for the SARS-CoV-2 negative patients.









**Table S5.** Performance measures of CRB, CRB-65, qSOFA and qSOFA-65 in terms of hospital mortality in the SARS-CoV-2 negative main cohort. Number of cases are provided together with absolute and relative frequencies (n, %) of died patients.

| Score cut-off   | Outcome present (n/N, %) with score values |                          | Sensitivity [%]   | Specificity [%]    | PPV [%]           | NPV [%]           | Positive LR         | Negative LR       | AUC               |
|-----------------|--------------------------------------------|--------------------------|-------------------|--------------------|-------------------|-------------------|---------------------|-------------------|-------------------|
|                 | Larger than or equal to the cut-off        | Smaller than the cut-off |                   |                    |                   |                   |                     |                   |                   |
| <b>CRB</b>      |                                            |                          |                   |                    |                   |                   |                     |                   |                   |
| ≥ 0             | 26309/ 167880 (15.7%)                      | -                        | 100 (100, 100)    | 0 (0, 0)           | 15.7 (15.5, 15.8) | -                 | 1.00 (1.00, 1.00)   | -                 | 0.64 (0.64, 0.64) |
| ≥ 1             | 13682/ 51165 (26.7%)                       | 12627/ 116715 (10.8%)    | 52.0 (51.4, 52.6) | 73.5 (73.3, 73.8)  | 26.7 (26.4, 27.1) | 89.2 (89.0, 89.4) | 1.96 (1.94, 1.99)   | 0.65 (0.65, 0.66) |                   |
| ≥ 2             | 3753/ 8251 (45.5%)                         | 22556/ 159629 (14.1%)    | 14.3 (13.8, 14.7) | 96.8 (96.7, 96.9)  | 45.5 (45.2, 45.8) | 85.9 (85.5, 86.2) | 4.49 (4.32, 4.67)   | 0.89 (0.88, 0.89) |                   |
| 3               | 513/ 800 (64.1%)                           | 25796/ 167080 (15.4%)    | 1.9 (1.8, 2.1)    | 99.8 (99.8, 99.8)  | 64.1 (63.4, 64.4) | 84.6 (83.7, 85.4) | 9.62 (8.84, 10.47)  | 0.98 (0.94, 1.02) |                   |
| <b>qSOFA</b>    |                                            |                          |                   |                    |                   |                   |                     |                   |                   |
| ≥ 0             | 26309/ 167880 (15.7%)                      | -                        | 100 (100, 100)    | 0 (0, 0)           | 15.7 (15.5, 15.8) | -                 | 1.00 (1.00, 1.00)   | -                 | 0.65 (0.65, 0.66) |
| ≥ 1             | 16808/ 70998 (23.7%)                       | 9501/ 96882 (9.8%)       | 63.9 (63.3, 64.5) | 61.7 (61.5, 62.0)  | 23.7 (23.4, 24.0) | 90.2 (90.0, 90.4) | 1.67 (1.65, 1.69)   | 0.59 (0.58, 0.59) |                   |
| ≥ 2             | 5731/ 13515 (42.4%)                        | 20578/ 154365 (13.3%)    | 21.8 (21.3, 22.3) | 94.5 (94.4, 94.6)  | 42.4 (41.9, 42.9) | 86.7 (86.4, 86.9) | 3.96 (3.85, 4.08)   | 0.83 (0.82, 0.83) |                   |
| 3               | 981/ 1588 (61.8%)                          | 25328/ 166292 (15.2%)    | 3.7 (3.5, 4.0)    | 99.6 (99.5, 99.6)  | 61.8 (61.5, 62.1) | 84.8 (84.1, 85.4) | 8.70 (8.21, 9.22)   | 0.97 (0.94, 0.99) |                   |
| <b>CRB-65</b>   |                                            |                          |                   |                    |                   |                   |                     |                   |                   |
| ≥ 0             | 26309/ 167880 (15.7%)                      | -                        | 100 (100, 100)    | 0 (0, 0)           | 15.7 (15.5, 15.8) | -                 | 1.00 (1.00, 1.00)   | -                 | 0.68 (0.68, 0.68) |
| ≥ 1             | 25273/ 137475 (18.4%)                      | 1036/ 30405 (3.4%)       | 96.1 (95.8, 96.3) | 20.7 (20.5, 21.0)  | 18.4 (18.2, 18.6) | 96.7 (96.4, 96.8) | 1.21 (1.21, 1.22)   | 0.19 (0.19, 0.19) |                   |
| ≥ 2             | 12883/ 44199 (29.1%)                       | 13426/ 123681 (10.9%)    | 49.0 (48.4, 49.6) | 77.9 (77.7, 78.1)  | 29.1 (28.7, 29.6) | 89.1 (88.9, 89.3) | 2.21 (2.18, 2.25)   | 0.66 (0.65, 0.66) |                   |
| ≥ 3             | 3469/ 7276 (47.7%)                         | 22840/ 160604 (14.2%)    | 13.2 (12.8, 13.6) | 97.3 (97.2, 97.49) | 47.7 (47.1, 48.2) | 85.8 (85.4, 86.1) | 4.90 (4.71, 5.11)   | 0.89 (0.89, 0.90) |                   |
| 4               | 461/ 699 (66.0%)                           | 25848/ 167181 (15.5%)    | 1.8 (1.6, 1.9)    | 99.8 (99.8, 99.9)  | 66.0 (65.7, 66.2) | 84.5 (83.7, 85.4) | 10.42 (9.56, 11.36) | 0.98 (0.95, 1.02) |                   |
| <b>qSOFA-65</b> |                                            |                          |                   |                    |                   |                   |                     |                   |                   |
| ≥ 0             | 26309/ 167880 (15.7%)                      | -                        | 100 (100, 100)    | 0 (0, 0)           | 15.7 (15.5, 15.8) | -                 | 1.00 (1.00, 1.00)   | -                 | 0.69 (0.69, 0.69) |
| ≥ 1             | 25626/ 143437 (17.9%)                      | 683/ 24443 (2.8%)        | 97.4 (97.2, 97.6) | 16.8 (16.6, 17.0)  | 17.9 (17.7, 18.1) | 97.2 (97.0, 97.4) | 1.17 (1.17, 1.17)   | 0.15 (0.15, 0.16) |                   |
| ≥ 2             | 15851/ 59068 (26.8%)                       | 10458/ 108812 (9.6%)     | 60.2 (59.7, 60.8) | 69.5 (69.2, 69.7)  | 26.8 (26.5, 27.2) | 90.4 (90.2, 90.6) | 1.97 (1.95, 2.00)   | 0.57 (0.57, 0.58) |                   |
| ≥ 3             | 5302/ 11652 (45.5%)                        | 21007/ 156228 (13.4%)    | 20.2 (19.7, 20.6) | 95.5 (95.4, 95.6)  | 45.5 (44.6, 46.4) | 86.6 (86.2, 86.9) | 4.49 (4.35, 4.64)   | 0.84 (0.83, 0.84) |                   |
| 4               | 879/ 1377 (63.8%)                          | 25430/ 166503 (15.3%)    | 3.3 (3.1, 3.6)    | 99.6 (99.6, 99.7)  | 63.8 (61.3, 66.4) | 84.7 (84.0, 85.4) | 9.50 (8.56, 10.54)  | 0.97 (0.96, 0.98) |                   |

**Table S6.** Multivariable analyses for hospital mortality, need for mechanical ventilation and combined endpoints hospital mortality or/ and mechanical ventilation for the SARS-CoV-2 negative main cohort. Risk ratio (RR) together with the 95% confidence interval (95% CI) and the corresponding p-value are provided. The results are based on Poisson regression modelling.

|                                                                               | SARS-CoV-2 neg. mortality |         | SARS-CoV-2 neg. mechanical ventilation |         | SARS-CoV-2 neg. mortality and/ or mechanical ventilation |         |
|-------------------------------------------------------------------------------|---------------------------|---------|----------------------------------------|---------|----------------------------------------------------------|---------|
|                                                                               | RR (95% CI)               | p-value | RR (95% CI)                            | p-value | RR (95% CI)                                              | p-value |
| <b>Primary multivariable model</b>                                            |                           |         |                                        |         |                                                          |         |
| <b>CRB-65 Score</b>                                                           |                           |         |                                        |         |                                                          |         |
| confusion (C)                                                                 | 1.92 (1.85, 1.98)         | 0.00    | 2.19 (2.10, 2.29)                      | 0.00    | 1.90 (1.85, 1.96)                                        | 0.00    |
| respiratory rate at admission $\geq$ 30 breaths/min (R)                       | 1.45 (1.39, 1.50)         | 0.00    | 1.73 (1.65, 1.81)                      | 0.00    | 1.49 (1.44, 1.54)                                        | 0.00    |
| systolic blood pressure $<$ 90 or diastolic blood pressure $\leq$ 60 mmHg (B) | 1.28 (1.23, 1.32)         | 0.00    | 1.26 (1.21, 1.32)                      | 0.00    | 1.24 (1.20, 1.27)                                        | 0.00    |
| age $\geq$ 65 years (65)                                                      | 2.99 (2.86, 3.13)         | 0.00    | 0.76 (0.73, 0.79)                      | 0.00    | 1.60 (1.55, 1.65)                                        | 0.00    |
| <b>qSOFA</b>                                                                  |                           |         |                                        |         |                                                          |         |
| respiratory rate at admission $\geq$ 22 breaths/min                           | 1.49 (1.45, 1.53)         | 0.00    | 1.71 (1.64, 1.77)                      | 0.00    | 1.54 (1.50, 1.57)                                        | 0.00    |
| systolic blood pressure $\leq$ 100 mmHg                                       | 1.82 (1.76, 1.89)         | 0.00    | 1.31 (1.25, 1.38)                      | 0.10    | 1.62 (1.57, 1.67)                                        | 0.00    |
| <b>Extended multivariable model</b>                                           |                           |         |                                        |         |                                                          |         |
| <b>CRB-65 Score</b>                                                           |                           |         |                                        |         |                                                          |         |
| confusion (C)                                                                 | 1.45 (1.41, 1.50)         | 0.00    | 2.00 (1.92, 2.09)                      | 0.00    | 1.55 (1.51, 1.60)                                        | 0.00    |
| respiratory rate at admission $\geq$ 30 breaths/min (R)                       | 1.18 (1.14, 1.22)         | 0.00    | 1.67 (1.60, 1.75)                      | 0.00    | 1.29 (1.25, 1.33)                                        | 0.00    |
| systolic blood pressure $<$ 90 or diastolic blood pressure $\leq$ 60 mmHg (B) | 1.16 (1.12, 1.19)         | 0.00    | 1.26 (1.21, 1.32)                      | 0.00    | 1.16 (1.12, 1.19)                                        | 0.00    |
| age $\geq$ 65 years (65)                                                      | 2.02 (1.93, 2.12)         | 0.00    | 0.74 (0.72, 0.77)                      | 0.00    | 1.24 (1.20, 1.28)                                        | 0.00    |
| <b>qSOFA</b>                                                                  |                           |         |                                        |         |                                                          |         |
| respiratory rate at admission $\geq$ 22 breaths/min                           | 1.30 (1.27, 1.34)         | 0.00    | 1.69 (1.63, 1.75)                      | 0.00    | 1.41 (1.37, 1.44)                                        | 0.00    |
| systolic blood pressure $\leq$ 100 mmHg                                       | 1.34 (1.30, 1.39)         | 0.00    | 1.27 (1.21, 1.34)                      | 0.00    | 1.30 (1.26, 1.34)                                        | 0.00    |
| male sex                                                                      | 1.08 (1.05, 1.11)         | 0.00    | 1.11 (1.07, 1.15)                      | 0.00    | 1.06 (1.04, 1.08)                                        | 0.00    |
| admission from nursing home                                                   | 1.05 (1.02, 1.08)         | 0.00    | 0.65 (0.62, 0.68)                      | 0.00    | 0.97 (0.95, 1.00)                                        | 0.05    |
| chronically bedridden                                                         | 1.18 (1.15, 1.22)         | 0.00    | 0.72 (0.69, 0.76)                      | 0.00    | 1.14 (1.11, 1.17)                                        | 0.00    |
| palliative treatment goal                                                     | 5.90 (5.70, 6.03)         | 0.00    | 2.08 (1.99, 2.17)                      | 0.00    | 3.80 (3.70, 3.89)                                        | 0.00    |

**Table S7.** Performance measures of CRB, CRB-65, qSOFA and qSOFA-65 in terms of mechanical ventilation in the SARS-CoV-2 negative main cohort. Number of cases are provided together with absolute and relative frequencies (n, %) of ventilated patients.

| Score cut-off   | Outcome present (n/N, %) with score values |                          | Sensitivity [%]   | Specificity [%]   | PPV [%]             | NPV [%]           | Positive LR       | Negative LR       | AUC                  |
|-----------------|--------------------------------------------|--------------------------|-------------------|-------------------|---------------------|-------------------|-------------------|-------------------|----------------------|
|                 | Larger than or equal to the cut-off        | Smaller than the cut-off |                   |                   |                     |                   |                   |                   |                      |
| <b>CRB</b>      |                                            |                          |                   |                   |                     |                   |                   |                   |                      |
| ≥ 0             | 15587/ 167880 (9.3%)                       | -                        | 100 (100, 100)    | 0 (0, 0)          | 9.3 (9.1, 9.4)      | -                 | 1.00 (1.00, 1.00) | -                 | 0.62<br>(0.61, 0.62) |
| ≥ 1             | 7788/ 51165 (15.2%)                        | 7799/ 116715 (6.7 %)     | 50.0 (49.2, 50.7) | 71.5 (71.3, 71.7) | 15.2 (14.9, 15.5)   | 93.3 (93.2, 93.5) | 1.75 (1.72, 1.79) | 0.70 (0.69, 0.70) |                      |
| ≥ 2             | 2258/ 8251 (27.4%)                         | 13329/ 159629 (8.3%)     | 14.5 (13.9, 15.0) | 96.1 (96.0, 96.2) | 27.4 (27.1, 27.6)   | 91.7 (91.4, 91.9) | 3.68 (3.53, 3.84) | 0.89 (0.88, 0.90) |                      |
| 3               | 318/ 800 (39.8%)                           | 15269/ 167080 (9.1%)     | 2.0 (1.8, 2.3)    | 99.7 (99.7, 99.7) | 39.8 (39.5, 40.0)   | 90.9 (90.2, 91.5) | 6.45 (5.79, 7.18) | 0.98 (0.94, 1.03) |                      |
| <b>qSOFA</b>    |                                            |                          |                   |                   |                     |                   |                   |                   |                      |
| ≥ 0             | 15587/ 167880 (9.3%)                       | -                        | 100 (100, 100)    | 0 (0, 0)          | 9.3 (9.1, 9.4)      | -                 | 1.00 (1.00, 1.00) | -                 | 0.64<br>(0.64, 0.64) |
| ≥ 1             | 9987/ 70998 (14.1%)                        | 5600/ 96882 (5.8%)       | 64.1 (63.3, 64.8) | 59.9 (59.7, 60.2) | 14.1 (13.8, 14.3)   | 94.2 (94.1, 94.4) | 1.60 (1.58, 1.62) | 0.60 (0.59, 0.60) |                      |
| ≥ 2             | 3174/ 13515 (23.5%)                        | 12413/ 154365 (8.0%)     | 20.4 (19.7, 21.0) | 93.2 (93.1, 93.3) | 23.5 (23.1, 23.9)   | 91.6 (91.7, 92.2) | 3.00 (2.90, 3.10) | 0.85 (0.85, 0.86) |                      |
| 3               | 537/ 1588 (33.8%)                          | 15050/ 166292 (9.1%)     | 3.4 (3.2, 3.7)    | 99.3 (99.3, 99.4) | 33.6 (33.5, 34.1)   | 90.9 (90.4, 91.5) | 4.99 (4.61, 5.41) | 0.97 (0.95, 1.00) |                      |
| <b>CRB-65</b>   |                                            |                          |                   |                   |                     |                   |                   |                   |                      |
| ≥ 0             | 15587/ 167880 (9.3%)                       | -                        | 100 (100, 100)    | 0 (0, 0)          | 9.3 (9.1, 9.4)      | -                 | 1.00 (1.00, 1.00) | -                 | 0.59<br>(0.59, 0.60) |
| ≥ 1             | 13449/ 137475 (9.8%)                       | 2138/ 30405 (7.0%)       | 86.3 (85.7, 86.8) | 18.6 (18.4, 18.8) | 9.8 (9.6, 9.9)      | 93.0 (92.7, 93.3) | 1.06 (1.05, 1.07) | 0.74 (0.73, 0.75) |                      |
| ≥ 2             | 6440/ 44199 (14.6%)                        | 9147/ 123681 (7.4%)      | 41.3 (40.5, 42.1) | 75.2 (75.0, 75.4) | 14.6 (14.2, 14.9)   | 92.6 (92.4, 92.8) | 1.67 (1.63, 1.70) | 0.78 (0.77, 0.79) |                      |
| ≥ 3             | 1823/ 7276 (25.1%)                         | 13764/ 160604 (8.6%)     | 11.7 (11.2, 12.2) | 96.4 (96.3, 96.5) | 25.1 (24.6, 25.5)   | 91.4 (91.1, 91.7) | 3.27 (3.12, 3.42) | 0.92 (0.90, 0.92) |                      |
| 4               | 251/ 699 (35.9%)                           | 15336/ 167181 (9.2%)     | 1.6 (1.4, 1.8)    | 99.7 (99.7, 99.7) | 35.9 (35.6, 36.2)   | 90.8 (90.1, 91.5) | 5.47 (4.86, 6.17) | 0.99 (0.95, 1.03) |                      |
| <b>qSOFA-65</b> |                                            |                          |                   |                   |                     |                   |                   |                   |                      |
| ≥ 0             | 15587/ 167880 (9.3%)                       | -                        | 100 (100, 100)    | 0 (0, 0)          | 9.3 (9.1, 9.4)      | -                 | 1.00 (1.00, 1.00) | -                 | 0.61<br>(0.61, 0.62) |
| ≥ 1             | 14159/ 143437 (9.9%)                       | 1428/ 24443 (5.8%)       | 90.8 (90.4, 91.3) | 15.1 (14.9, 15.3) | 9.9 (9.7, 10.0)     | 94.1 (93.9, 94.5) | 1.07 (1.07, 1.08) | 0.61 (0.59, 0.62) |                      |
| ≥ 2             | 8194/ 59068 (13.9%)                        | 7393/ 108812 (6.8%)      | 52.6 (51.8, 53.4) | 66.6 (66.4, 66.8) | 13.9 (13.6, 14.2)   | 93.2 (93.0, 93.4) | 1.57 (1.55, 1.60) | 0.71 (0.71, 0.72) |                      |
| ≥ 3             | 2538/ 11652 (21.8%)                        | 13049/ 156228 (8.4%)     | 16.3 (15.7, 16.9) | 94.0 (93.9, 94.1) | 21.8 (21.03, 22.53) | 91.6 (91.4, 91.9) | 2.72 (2.62, 2.82) | 0.89 (0.88, 0.90) |                      |
| 4               | 406/ 1377 (29.5%)                          | 15181/ 166503 (9.1%)     | 2.6 (2.4, 2.9)    | 99.4 (99.4, 99.4) | 0.29 (27.08, 31.89) | 90.9 (90.3, 91.4) | 4.09 (3.67, 4.55) | 0.98 (0.97, 0.99) |                      |

**Table S8.** Performance measures of CRB, CRB-65, qSOFA and qSOFA-65 in terms of combined endpoint hospital mortality and/ or ventilation in the SARS-CoV-2 positive main cohort. Number of cases are provided together with absolute and relative frequencies (n, %) of died and/ or ventilated patients.

| Score cut-off   | Outcome present (n/N, %) with score values |                          | Sensitivity [%]   | Specificity [%]   | PPV [%]           | NPV [%]           | Positive LR          | Negative LR       | AUC                  |
|-----------------|--------------------------------------------|--------------------------|-------------------|-------------------|-------------------|-------------------|----------------------|-------------------|----------------------|
|                 | Larger than or equal to the cut-off        | Smaller than the cut-off |                   |                   |                   |                   |                      |                   |                      |
| <b>CRB</b>      |                                            |                          |                   |                   |                   |                   |                      |                   |                      |
| ≥ 0             | 20528/ 68594 (29.9%)                       | -                        | 100 (100, 100)    | 0 (0, 0)          | 29.9 (29.6, 30.3) | -                 | 1.00 (1.00, 1.00)    | -                 | 0.63<br>(0.62, 0.63) |
| ≥ 1             | 8485/ 16655 (51.0%)                        | 12043 /51939 (23.2%)     | 41.3 (40.7, 42.0) | 83.0 (82.7, 83.3) | 51.0 (50.2, 51.7) | 76.8 (76.5, 77.2) | 2.43 (2.37, 2.49)    | 0.71 (0.70, 0.71) |                      |
| ≥ 2             | 1841/ 2404 (76.6%)                         | 18687/ 66190 (28.2%)     | 9.0 (8.6, 9.4)    | 98.8 (98.7, 98.9) | 76.6 (74.9, 78.3) | 71.8 (71.4, 72.1) | 7.66 (7.00, 8.37)    | 0.92 (0.92, 0.92) |                      |
| 3               | 231/ 258 (89.5%)                           | 20297/ 68336 (29.7%)     | 1.1 (1.0, 1.3)    | 99.9 (99.9, 100)  | 89.5 (85.8, 93.3) | 70.3 (70.0, 70.6) | 20.03 (13.45, 29.83) | 0.99 (0.99, 0.99) |                      |
| <b>qSOFA</b>    |                                            |                          |                   |                   |                   |                   |                      |                   |                      |
| ≥ 0             | 20528/ 68594 (29.9%)                       | -                        | 100 (100, 100)    | 0 (0, 0)          | 29.9 (29.6, 30.3) | -                 | 1.00 (1.00, 1.00)    | -                 | 0.64<br>(0.64, 0.65) |
| ≥ 1             | 11696/ 26713 (43.8%)                       | 8832/ 41881 (21.1%)      | 57.0 (56.3, 57.7) | 68.8 (68.3, 69.2) | 43.8 (43.2, 44.4) | 78.9 (78.5, 79.3) | 1.82 (1.79, 1.86)    | 0.63 (0.62, 0.63) |                      |
| ≥ 2             | 2686/ 3918 (68.6%)                         | 17842/ 64676 (27.6%)     | 13.1 (12.6, 13.5) | 97.4 (97.3, 97.6) | 68.6 (67.1, 70.0) | 72.4 (72.1, 72.8) | 5.10 (4.79, 5.44)    | 0.89 (0.89, 0.89) |                      |
| 3               | 346/ 403 (85.9%)                           | 20182/ 68191 (29.6%)     | 1.7 (1.5, 1.9)    | 99.9 (99.9, 99.9) | 85.9 (82.5, 89.3) | 70.4 (70.1, 70.7) | 14.21 (10.75, 18.80) | 0.98 (0.98, 0.99) |                      |
| <b>CRB-65</b>   |                                            |                          |                   |                   |                   |                   |                      |                   |                      |
| ≥ 0             | 20528/ 68594 (29.9%)                       | -                        | 100 (100, 100)    | 0 (0, 0)          | 29.9 (29.6, 30.3) | -                 | 1.00 (1.00, 1.00)    | -                 | 0.71<br>(0.71, 0.71) |
| ≥ 1             | 18153/ 46201 (39.3%)                       | 2375/ 22393 (10.6%)      | 88.4 (88.0, 88.9) | 41.6 (41.2, 42.1) | 39.3 (38.8, 39.7) | 89.4 (89.0, 89.8) | 1.52 (1.50, 1.53)    | 0.28 (0.27, 0.29) |                      |
| ≥ 2             | 7552/ 12993 (58.1%)                        | 12976/ 55601 (23.3%)     | 36.8 (36.1, 37.4) | 88.7 (88.4, 89.0) | 58.1 (57.3, 59.0) | 76.7 (76.3, 77.0) | 3.25 (3.15, 3.35)    | 0.71 (0.71, 0.72) |                      |
| ≥ 3             | 1679/ 2114 (79.4%)                         | 18849/ 66480 (28.4%)     | 8.2 (7.8, 8.6)    | 99.1 (99.0, 99.2) | 79.4 (77.5, 81.3) | 71.7 (71.3, 72.0) | 9.04 (8.16, 10.01)   | 0.93 (0.92, 0.93) |                      |
| 4               | 222/ 247 (89.9%)                           | 20306/ 68347 (29.7%)     | 1.1 (0.9, 1.2)    | 99.9 (99.9, 100)  | 89.9 (86.1, 93.6) | 70.3 (70.0, 70.6) | 20.79 (13.76, 31.43) | 0.99(0.98, 0.99)  |                      |
| <b>qSOFA-65</b> |                                            |                          |                   |                   |                   |                   |                      |                   |                      |
| ≥ 0             | 20528/ 68594 (29.9%)                       | -                        | 100 (100, 100)    | 0 (0, 0)          | 29.9 (29.6, 30.3) | -                 | 1.00 (1.00, 1.00)    | -                 | 0.72<br>(0.71, 0.72) |
| ≥ 1             | 18954/ 50833 (37.3%)                       | 1574/ 17761 (8.9%)       | 92.3 (92.0, 92.7) | 33.7 (33.3, 34.1) | 37.3 (36.9, 37.7) | 91.1 (90.7, 91.6) | 1.39 (1.38, 1.40)    | 0.23 (0.22, 0.24) |                      |
| ≥ 2             | 10063/ 18720 (53.8%)                       | 10465/ 49874 (21.0%)     | 49.0 (48.3, 49.7) | 82.0 (81.6, 82.3) | 53.8 (53.0, 54.5) | 79.0 (78.7, 79.4) | 2.72 (2.66, 2.79)    | 0.62 (0.61, 0.63) |                      |
| ≥ 3             | 2435/ 3345 (72.8%)                         | 18093/ 65249 (27.7%)     | 11.9 (11.4, 12.3) | 98.1 (98.0, 98.2) | 72.8 (71.0, 74.5) | 72.3 (71.9, 72.6) | 6.27 (5.83, 6.73)    | 0.90 (0.89, 0.90) |                      |
| 4               | 325/ 374 (86.9%)                           | 20203/ 68220 (29.6%)     | 1.6 (1.4, 1.8)    | 99.9 (99.9, 99.9) | 86.9 (83.5, 90.3) | 70.4 (70.1, 70.7) | 15.53 (11.51, 20.96) | 0.99 (0.98, 0.99) |                      |

**Table S9.** Performance measures of CRB, CRB-65, qSOFA and qSOFA-65 in terms of combined endpoint hospital mortality and/ or ventilation in the SARS-CoV-2 negative main cohort. Number of cases are provided together with absolute and relative frequencies (n, %) of died and/ or ventilated patients.

| Score cut-off   | Outcome present (n/N, %) with score values |                          | Sensitivity [%]   | Specificity [%]   | PPV [%]           | NPV [%]            | Positive LR          | Negative LR       | AUC                  |
|-----------------|--------------------------------------------|--------------------------|-------------------|-------------------|-------------------|--------------------|----------------------|-------------------|----------------------|
|                 | Larger than or equal to the cut-off        | Smaller than the cut-off |                   |                   |                   |                    |                      |                   |                      |
| <b>CRB</b>      |                                            |                          |                   |                   |                   |                    |                      |                   |                      |
| ≥ 0             | 35158/ 167880 (20.9%)                      | -                        | 100 (100, 100)    | 0 (0, 0)          | 20.9 (20.7, 21.1) | -                  | 1.00 (1.00, 1.00)    | -                 | 0.63<br>(0.63, 0.64) |
| ≥ 1             | 17568/ 51165 (34.3%)                       | 17590/ 116715 (15.1%)    | 50.0 (49.9, 50.5) | 74.7 (74.5, 74.9) | 34.3 (33.9, 34.7) | 84.9 (84.7, 85.1)  | 1.97 (1.95, 2.00)    | 0.67 (0.67, 0.67) |                      |
| ≥ 2             | 4693/ 8251 (56.9%)                         | 30465/ 159629 (19.1%)    | 13.3 (13.0, 13.7) | 97.3 (97.2, 97.4) | 56.9 (56.6, 57.2) | 80.96 (80.5, 81.3) | 4.98 (4.79, 5.18)    | 0.89 (0.89, 0.89) |                      |
| 3               | 612/ 800 (76.5%)                           | 34546/ 167080 (20.7%)    | 1.7 (1.6, 1.9)    | 99.9 (99.8, 99.9) | 76.5 (76.3, 76.7) | 79.3 (78.4, 80.2)  | 12.29 (11.37, 13.28) | 0.98 (0.94, 1.03) |                      |
| <b>qSOFA</b>    |                                            |                          |                   |                   |                   |                    |                      |                   |                      |
| ≥ 0             | 35158/ 167880 (20.9%)                      | -                        | 100 (100, 100)    | 0 (0, 0)          | 20.9 (20.7, 21.1) | -                  | 1.00 (1.00, 1.00)    | -                 | 0.65<br>(0.65, 0.66) |
| ≥ 1             | 22111/ 70998 (31.1%)                       | 13047/ 96882 (13.5%)     | 62.9 (62.4, 63.4) | 63.2 (62.9, 63.4) | 31.1 (30.8, 31.5) | 86.5 (86.3, 86.7)  | 1.71 (1.69, 1.73)    | 0.59 (0.58, 0.59) |                      |
| ≥ 2             | 7123/ 13515 (52.7%)                        | 28035/ 154365 (18.2%)    | 20.3 (19.8, 20.7) | 95.2 (95.1, 95.3) | 52.7 (52.2, 53.2) | 81.8 (81.5, 82.2)  | 4.21 (4.08, 4.33)    | 0.84 (0.83, 0.84) |                      |
| 3               | 1159/ 1588 (73.0%)                         | 33999/ 166292 (20.4%)    | 3.3 (3.1, 3.5)    | 99.7 (99.6, 99.7) | 73.0 (72.7, 73.3) | 79.6 (78.8, 80.3)  | 10.20 (9.66, 10.77)  | 0.97 (0.95, 1.00) |                      |
| <b>CRB-65</b>   |                                            |                          |                   |                   |                   |                    |                      |                   |                      |
| ≥ 0             | 35158/ 167880 (20.9%)                      | -                        | 100 (100, 100)    | 0 (0, 0)          | 20.9 (20.7, 21.1) | -                  | 1.00 (1.00, 1.00)    | -                 | 0.65<br>(0.65, 0.66) |
| ≥ 1             | 32454/ 137475 (23.6%)                      | 2704/ 30405 (8.9%)       | 92.3 (92.0, 92.6) | 20.9 (20.7, 21.1) | 23.6 (23.4, 23.8) | 91.1 (90.8, 91.4)  | 1.17 (1.16, 1.17)    | 0.37 (0.36, 0.37) |                      |
| ≥ 2             | 15862/ 44199 (35.9%)                       | 19296/ 123681 (15.6%)    | 45.1 (44.6, 45.6) | 78.6 (78.4, 78.9) | 35.9 (35.4, 36.3) | 84.4 (84.2, 84.6)  | 2.11 (2.08, 2.14)    | 0.70 (0.69, 0.70) |                      |
| ≥ 3             | 4164/ 7276 (57.2%)                         | 30994/ 160604 (19.3%)    | 11.8 (11.5, 12.2) | 97.7 (97.6, 97.7) | 57.2 (56.7, 57.8) | 80.7 (80.3, 81.1)  | 5.05 (4.84, 5.27)    | 0.90 (0.90, 0.91) |                      |
| 4               | 528/ 699 (75.5%)                           | 34630/ 167181 (20.7%)    | 1.5 (1.4, 1.6)    | 99.9 (99.9, 99.9) | 75.5 (75.3, 75.8) | 79.3 (78.3, 80.3)  | 11.66 (10.74, 12.65) | 0.99 (0.95, 1.02) |                      |
| <b>qSOFA-65</b> |                                            |                          |                   |                   |                   |                    |                      |                   |                      |
| ≥ 0             | 35158/ 167880 (20.9%)                      | -                        | 100 (100, 100)    | 0 (0, 0)          | 20.9 (20.7, 21.1) | -                  | 1.00 (1.00, 1.00)    | -                 | 0.67<br>(0.67, 0.67) |
| ≥ 1             | 33351/ 143437 (23.3%)                      | 1807/ 24453 (7.4%)       | 94.9 (94.6, 95.1) | 17.1 (16.9, 17.3) | 23.3 (23.0, 23.5) | 92.6 (92.3, 92.9)  | 1.14 (1.14, 1.15)    | 0.30 (0.30, 0.31) |                      |
| ≥ 2             | 19871/ 59068 (33.6%)                       | 15287/ 108812 (14.0%)    | 56.5 (56.0, 57.0) | 70.5 (70.2, 70.7) | 33.6 (33.3, 34.0) | 86.0 (85.7, 86.2)  | 1.91 (1.89, 1.94)    | 0.62 (0.61, 0.62) |                      |
| ≥ 3             | 6312/ 11652 (54.2%)                        | 28846/ 156228 (18.5%)    | 18.0 (17.6, 18.4) | 96.0 (95.9, 96.1) | 54.2 (53.3, 55.1) | 81.5 (81.2, 81.9)  | 4.46 (4.32, 4.61)    | 0.85 (0.85, 0.86) |                      |
| 4               | 994/ 1377 (72.2%)                          | 34164/ 166503 (20.5%)    | 2.8 (2.7, 3.0)    | 99.7 (99.7, 99.7) | 0.72 (69.8, 74.6) | 79.5 (78.7, 80.3)  | 9.80 (8.76, 10.96)   | 0.97 (0.97, 0.98) |                      |

**Table S10.** Multivariable analyses for hospital mortality, need for mechanical ventilation and combined endpoints hospital mortality or/ and ventilation in the SARS-CoV-2 positive reduced cohort 1 (after excluding patients with chronically bedridden, admission from nursing home and palliative treatment goal). Risk ratio (RR) together with the 95% confidence interval (95% CI) and the corresponding p-value are provided. The results are based on Poisson regression modelling

|                                                                               | SARS-CoV-2 pos. mortality |         | SARS-CoV-2 pos. mechanical ventilation |         | SARS-CoV-2 pos. mortality and/ or mechanical ventilation |         |
|-------------------------------------------------------------------------------|---------------------------|---------|----------------------------------------|---------|----------------------------------------------------------|---------|
|                                                                               | RR (95% CI)               | p-value | RR (95% CI)                            | p-value | RR (95% CI)                                              | p-value |
| <b>Primary multivariable model</b>                                            |                           |         |                                        |         |                                                          |         |
| <b>CRB-65 Score</b>                                                           |                           |         |                                        |         |                                                          |         |
| confusion (C)                                                                 | 2.0 (1.83, 2.19)          | 0.00    | 1.74 (1.59, 1.90)                      | 0.00    | 1.82 (1.69, 1.96)                                        | 0.00    |
| respiratory rate at admission $\geq$ 30 breaths/min (R)                       | 1.73 (1.58, 1.89)         | 0.00    | 1.87 (1.74, 2.01)                      | 0.00    | 1.75 (1.64, 1.87)                                        | 0.00    |
| systolic blood pressure $<$ 90 or diastolic blood pressure $\leq$ 60 mmHg (B) | 1.49 (1.37, 1.62)         | 0.00    | 1.35 (1.26, 1.45)                      | 0.00    | 1.34 (1.26, 1.43)                                        | 0.00    |
| age $\geq$ 65 years (65)                                                      | 6.85 (6.24, 7.53)         | 0.00    | 1.27 (1.21, 1.33)                      | 0.00    | 1.81 (1.73, 1.89)                                        | 0.00    |
| <b>qSOFA</b>                                                                  |                           |         |                                        |         |                                                          |         |
| respiratory rate at admission $\geq$ 22 breaths/min                           | 1.71 (1.6, 1.83)          | 0.00    | 1.86 (1.76, 1.96)                      | 0.00    | 1.71 (1.63, 1.79)                                        | 0.00    |
| systolic blood pressure $\leq$ 100 mmHg                                       | 1.47 (1.32, 1.65)         | 0.00    | 1.09 (0.98, 1.20)                      | 0.12    | 1.25 (1.14, 1.36)                                        | 0.00    |

**Table S11.** Performance measures of CRB, CRB-65, qSOFA and qSOFA-65 in terms of hospital mortality in the SARS-CoV-2 positive reduced cohort 1 (after excluding patients with chronically bedridden, admission from nursing home and palliative treatment goal). Number of cases are provided together with absolute and relative frequencies (n, %) of died patients.

| Score cut-off   | Outcome present (n/N, %) with score values |                          | Sensitivity [%]   | Specificity [%]   | PPV [%]           | NPV [%]           | Positive LR          | Negative LR       | AUC               |
|-----------------|--------------------------------------------|--------------------------|-------------------|-------------------|-------------------|-------------------|----------------------|-------------------|-------------------|
|                 | Larger than or equal to the cut-off        | Smaller than the cut-off |                   |                   |                   |                   |                      |                   |                   |
| <b>CRB</b>      |                                            |                          |                   |                   |                   |                   |                      |                   |                   |
| ≥ 0             | 4512/ 51015 (8.8%)                         | -                        | 100 (100, 100)    | 0 (0, 0)          | 8.8 (8.0, 9.7)    | -                 | 1.00 (1.00, 1.00)    | -                 | 0.63 (0.62, 0.63) |
| ≥ 1             | 1849/ 9649 (19.2%)                         | 2663/ 41366 (6.4%)       | 41.0 (39.5, 42.4) | 83.2 (82.9, 83.6) | 19.2 (17.4, 21.0) | 93.6 (93.3, 93.8) | 2.44 (2.35, 2.54)    | 0.71 (0.70, 0.72) |                   |
| ≥ 2             | 398/ 957 (41.6%)                           | 4114/ 50058 (8.2%)       | 8.8 (8.0, 9.6)    | 98.8 (98.7, 98.9) | 41.6 (36.8, 46.4) | 91.8 (91.2, 92.4) | 7.34 (6.52, 8.26)    | 0.92 (0.91, 0.93) |                   |
| 3               | 54/ 74 (73.0%)                             | 4458/ 50941 (8.8%)       | 1.2 (0.9, 1.5)    | 100 (99.9, 100)   | 73.0 (61.3, 84.7) | 91.2 (89.4, 93.1) | 27.83 (21.38, 36.22) | 0.99 (0.87, 1.12) |                   |
| <b>qSOFA</b>    |                                            |                          |                   |                   |                   |                   |                      |                   |                   |
| ≥ 0             | 4512/ 51015 (8.8%)                         | -                        | 100 (100, 100)    | 0 (0, 0)          | 8.8 (8.2, 9.7)    | -                 | 1.00 (1.00, 1.00)    | -                 | 0.63 (0.63, 0.64) |
| ≥ 1             | 2541/ 17372 (14.6%)                        | 1971/ 33643 (5.9%)       | 56.3 (54.9, 57.8) | 68.1 (67.7, 68.5) | 14.6 (13.3, 16.0) | 94.1 (93.9, 94.4) | 1.77 (1.72, 1.82)    | 0.64 (0.63, 0.65) |                   |
| ≥ 2             | 547/ 1672 (32.7%)                          | 3965/ 49343 (8.0%)       | 12.1 (11.2, 13.1) | 97.6 (97.4, 97.7) | 32.7 (28.8, 36.6) | 92.0 (91.5, 92.4) | 5.01 (4.57, 5.50)    | 0.90 (0.89, 0.91) |                   |
| 3               | 73/ 112 (65.2%)                            | 4439/ 50903 (8.7%)       | 1.6 (1.2, 2.0)    | 99.9 (99.9, 99.9) | 65.2 (54.4, 76.0) | 91.3 (89.9, 92.7) | 19.29 (15.49, 24.03) | 0.98 (0.91, 1.06) |                   |
| <b>CRB-65</b>   |                                            |                          |                   |                   |                   |                   |                      |                   |                   |
| ≥ 0             | 4512/ 51015 (8.8%)                         | -                        | 100 (100, 100)    | 0 (0, 0)          | 8.8 (8.2, 9.7)    | -                 | 1.00 (1.00, 1.00)    | -                 | 0.75 (0.75, 0.76) |
| ≥ 1             | 4195/ 2940 (14.3%)                         | 317/ 21775 (1.5%)        | 93.0 (92.2, 93.7) | 46.1 (45.7, 46.6) | 14.3(13.3, 15.4)  | 98.5 (98.4, 98.7) | 1.73 (1.71, 1.75)    | 0.15 (0.15, 0.16) |                   |
| ≥ 2             | 1693/ 6267 (27.0%)                         | 2819/ 44748 (6.3%)       | 37.5 (36.1, 38.9) | 90.2 (89.9, 90.4) | 27.0 (24.9, 29.1) | 93.7(93.4, 94.0)  | 3.81 (3.65, 3.99)    | 0.69 (0.69, 0.70) |                   |
| ≥ 3             | 356/ 716 (49.7%)                           | 4156/ 50299 (8.3%)       | 7.9 (7.1, 8.7)    | 99.2 (99.1, 99.3) | 49.7 (44.5, 54.9) | 91.7 (91.0, 92.5) | 10.19 (8.90, 11.67)  | 0.93 (0.92, 0.94) |                   |
| 4               | 51/ 68 (75.0%)                             | 4461/ 50947 (8.8%)       | 1.1 (0.8, 1.4)    | 100 (99.9, 100)   | 75.0 (63.3, 86.8) | 91.2 (89.1, 93.4) | 30.92 (23.80, 40.16) | 0.99 (0.88, 1.12) |                   |
| <b>qSOFA-65</b> |                                            |                          |                   |                   |                   |                   |                      |                   |                   |
| ≥ 0             | 4512/ 51015 (8.8%)                         | -                        | 100 (100, 100)    | 0 (0, 0)          | 8.8 (8.2, 9.7)    | -                 | 1.00 (1.00, 1.00)    | -                 | 0.75 (0.74, 0.76) |
| ≥ 1             | 4312/ 33706 (12.8%)                        | 200/ 17309 (1.2%)        | 95.6 (95.0, 96.2) | 36.8 (36.4, 37.2) | 12.8 (11.8, 13.8) | 98.8 (98.7, 99.0) | 1.51 (1.50, 1.53)    | 0.12 (0.12, 0.12) |                   |
| ≥ 2             | 2292/ 9783 (23.4%)                         | 2220/ 41232 (5.4%)       | 50.8 (49.3, 52.3) | 83.9 (83.6, 84.2) | 23.4 (21.7, 25.2) | 94.6 (94.3, 94.9) | 3.15 (3.05, 3.26)    | 0.59 (0.58, 0.59) |                   |
| ≥ 3             | 485/ 1186 (40.9%)                          | 4027/ 49829 (8.1%)       | 10.7 (9.8, 11.7)  | 98.5 (98.4, 98.6) | 40.9 (36.5, 45.3) | 91.9 (91.3, 92.5) | 7.13 (6.41, 7.93)    | 0.91 (0.90, 0.92) |                   |
| 4               | 66/ 92 (71.7%)                             | 4446/ 50923 (8.7%)       | 1.5 (1.1, 1.8)    | 99.9 (99.9, 100)  | 71.7 (61.0, 82.5) | 91.3 (89.6, 92.9) | 26.16 (16.87, 40.57) | 0.99 (0.97, 1.00) |                   |

**Table S12.** Performance measures of CRB, CRB-65, qSOFA and qSOFA-65 in terms of mechanical ventilation in the SARS-CoV-2 positive reduced cohort 1 (after excluding patients with chronically bedridden, admission from nursing home and palliative treatment goal). Number of cases are provided together with absolute and relative frequencies (n, %) of ventilated patients.

| Score cut-off   | Outcome present (n/N, %) with score values |                          | Sensitivity [%]   | Specificity [%]   | PPV [%]           | NPV [%]           | Positive LR        | Negative LR       | AUC                  |
|-----------------|--------------------------------------------|--------------------------|-------------------|-------------------|-------------------|-------------------|--------------------|-------------------|----------------------|
|                 | Larger than or equal to the cut-off        | Smaller than the cut-off |                   |                   |                   |                   |                    |                   |                      |
| <b>CRB</b>      |                                            |                          |                   |                   |                   |                   |                    |                   |                      |
| ≥ 0             | 7119/ 51015(14.0%)                         | -                        | 100 (100, 100)    | 0 (0, 0)          | 14.0 (13.7, 14.3) | -                 | 1.00 (1.00, 1.00)  | -                 | 0.60<br>(0.59, 0.60) |
| ≥ 1             | 2504/ 9649 (26.0%)                         | 4615/ 41366 (11.2%)      | 35.2 (34.1, 36.3) | 83.7 (83.4, 84.1) | 26.0 (25.1, 26.8) | 88.8 (88.5, 89.1) | 2.16 (2.08, 2.24)  | 0.77 (0.77, 0.78) |                      |
| ≥ 2             | 443/ 957 (46.3%)                           | 6676/ 50058 (13.3%)      | 6.2 (5.7, 6.8)    | 98.8 (98.7, 98.9) | 46.3 (45.7, 46.8) | 86.7 (85.9, 87.4) | 5.31 (4.72, 5.98)  | 0.95 (0.94, 0.96) |                      |
| 3               | 43/ 74 (58.1%)                             | 7076/ 50941 (13.9%)      | 0.6 (0.4, 0.8)    | 99.9 (99.9, 100)  | 58.1 (57.6, 58.6) | 86.1 (83.8, 88.4) | 8.55 (6.35, 11.51) | 0.99 (0.88, 1.13) |                      |
| <b>qSOFA</b>    |                                            |                          |                   |                   |                   |                   |                    |                   |                      |
| ≥ 0             | 7119/ 51015 (14.0%)                        | -                        | 100 (100, 100)    | 0 (0, 0)          | 14.0 (13.7, 14.3) | -                 | 1.00 (1.00, 1.00)  | -                 | 0.63<br>(0.62, 0.63) |
| ≥ 1             | 3887/ 17372 (22.4%)                        | 3232/ 33643 (9.6%)       | 54.6 (53.4, 55.8) | 69.3 (68.8, 69.7) | 22.4 (21.8, 23.0) | 90.4 (90.1, 90.7) | 1.78 (1.73, 1.82)  | 0.66 (0.65, 0.66) |                      |
| ≥ 2             | 607/ 1672 (36.3%)                          | 6512/ 49343 (13.2%)      | 8.5 (7.9, 9.2)    | 97.6 (97.4, 97.7) | 36.3 (35.7, 36.9) | 86.8 (86.3, 87.3) | 3.51 (3.20, 3.86)  | 0.94 (0.93, 0.94) |                      |
| 3               | 54/ 112 (48.2%)                            | 7065/ 50903 (13.9%)      | 0.8 (0.6, 1.0)    | 99.9 (99.8, 99.9) | 48.2 (47.7, 48.7) | 86.1 (84.4, 87.8) | 5.74 (4.41, 7.48)  | 0.99 (0.91, 1.09) |                      |
| <b>CRB-65</b>   |                                            |                          |                   |                   |                   |                   |                    |                   |                      |
| ≥ 0             | 7119/ 51015 (14.0%)                        | -                        | 100 (100, 100)    | 0 (0, 0)          | 14.0 (13.7, 14.3) | -                 | 1.00 (1.00, 1.00)  | -                 | 0.61<br>(0.60, 0.62) |
| ≥ 1             | 5026/ 29240 (17.2%)                        | 2093/ 21775 (9.6%)       | 70.6 (69.5, 71.7) | 44.8 (44.4, 45.3) | 17.2 (16.8, 17.6) | 90.4 (90.0, 90.8) | 1.28 (1.26, 1.30)  | 0.66 (0.64, 0.67) |                      |
| ≥ 2             | 1750/ 6267 (27.9%)                         | 5369/ 44748 (12.0%)      | 24.6 (23.6, 25.6) | 89.7 (89.4, 90.0) | 27.9 (26.8, 29.0) | 88.0 (87.6, 88.4) | 2.39 (2.28, 2.50)  | 0.84 (0.83, 0.85) |                      |
| ≥ 3             | 318/ 716 (44.4%)                           | 6801/ 50299 (13.5%)      | 4.5 (4.0, 4.9)    | 99.1 (99.0, 99.2) | 44.4 (43.7, 45.2) | 86.5 (85.6, 87.4) | 4.93 (4.30, 5.65)  | 0.96 (0.95, 0.98) |                      |
| 4               | 38/ 68 (55.9%)                             | 7081/ 50947 (13.9%)      | 0.5 (0.4, 0.7)    | 99.9 (99.9, 100)  | 55.9 (55.4, 56.4) | 86.1 (86.4, 88.8) | 7.81 (5.70, 10.70) | 1.00 (0.86, 1.15) |                      |
| <b>qSOFA-65</b> |                                            |                          |                   |                   |                   |                   |                    |                   |                      |
| ≥ 0             | 7119/ 51015 (14.0%)                        | -                        | 100 (100, 100)    | 0 (0, 0)          | 14.0 (13.7, 14.3) | -                 | 1.00 (1.00, 1.00)  | -                 | 0.63<br>(0.62, 0.64) |
| ≥ 1             | 5734/ 33706 (17.0%)                        | 1385/ 17309 (8.0%)       | 80.5 (79.6, 81.5) | 36.3 (35.8, 36.7) | 17.0 (16.6, 17.4) | 92.0 (91.6, 92.4) | 1.26 (1.25, 1.28)  | 0.54 (0.53, 0.55) |                      |
| ≥ 2             | 2492/ 9783 (25.5%)                         | 4627/ 41232 (11.2%)      | 35.0 (33.9, 36.1) | 83.4 (83.0, 83.7) | 25.5 (24.6, 26.3) | 88.8 (88.4, 89.2) | 2.11 (2.03, 2.18)  | 0.78 (0.77, 0.79) |                      |
| ≥ 3             | 424/ 1186 (35.8%)                          | 6695/ 49829 (13.4%)      | 6.0 (5.4, 6.5)    | 98.3 (98.1, 98.4) | 35.8 (33.0, 38.5) | 86.6 (85.8, 87.3) | 3.43 (3.07, 3.83)  | 0.96 (0.95, 0.97) |                      |
| 4               | 40/ 92 (43.4%)                             | 7079/ 50923 (13.9%)      | 0.6 (0.4, 0.7)    | 99.9 (99.8, 99.9) | 43.5 (33.3, 53.6) | 86.1 (84.0, 88.1) | 4.74 (3.20, 7.04)  | 1.00 (0.98, 1.01) |                      |

**Table S13.** Performance measures of CRB, CRB-65, qSOFA and qSOFA-65 in terms of combined endpoint hospital mortality and/ or mechanical ventilation in the SARS-CoV-2 positive reduced cohort 1 (after excluding patients with chronically bedridden, admission from nursing home and palliative treatment goal). Number of cases are provided together with absolute and relative frequencies (n, %) of died and/ or ventilated patients.

| Score cut-off   | Outcome present (n/N, %) with score values |                          | Sensitivity [%]   | Specificity [%]   | PPV [%]           | NPV [%]           | Positive LR          | Negative LR       | AUC                  |
|-----------------|--------------------------------------------|--------------------------|-------------------|-------------------|-------------------|-------------------|----------------------|-------------------|----------------------|
|                 | Larger than or equal to the cut-off        | Smaller than the cut-off |                   |                   |                   |                   |                      |                   |                      |
| <b>CRB</b>      |                                            |                          |                   |                   |                   |                   |                      |                   |                      |
| ≥ 0             | 9135/ 51015 (17.9%)                        | -                        | 100 (100, 100)    | 0 (0, 0)          | 17.9 (17.6, 18.2) | -                 | 1.00 (1.00, 1.00)    | -                 | 0.60<br>(0.60, 0.61) |
| ≥ 1             | 3242/ 9649 (33.6%)                         | 5893/ 41366 (14.2%)      | 35.5 (34.5, 36.5) | 84.7 (84.4, 85.0) | 33.6 (32.7, 34.5) | 85.8 (85.4, 86.1) | 2.32 (2.24, 2.40)    | 0.76 (0.76, 0.77) |                      |
| ≥ 2             | 589/ 957 (61.5%)                           | 8546/ 50058 (17.1%)      | 6.4 (5.9, 7.0)    | 99.1 (99.0, 99.2) | 61.5 (58.5, 64.6) | 82.9 (82.6, 83.3) | 7.34 (6.49, 8.30)    | 0.94 (0.94, 0.95) |                      |
| 3               | 61/ 74 (82.4%)                             | 9074/ 50941 (17.8%)      | 0.7 (0.5, 0.8)    | 100 (100, 100)    | 82.4 (73.8, 91.1) | 82.2 (81.9, 82.5) | 21.51 (11.83, 39.13) | 0.99 (0.99, 1.00) |                      |
| <b>qSOFA</b>    |                                            |                          |                   |                   |                   |                   |                      |                   |                      |
| ≥ 0             | 9135/ 51015 (17.9%)                        | -                        | 100 (100, 100)    | 0 (0, 0)          | 17.9 (17.6, 18.2) | -                 | 1.00 (1.00, 1.00)    | -                 | 0.63<br>(0.62, 0.63) |
| ≥ 1             | 4892/ 17372 (28.2%)                        | 4243/ 33643 (12.6%)      | 53.6 (52.5, 54.6) | 70.2 (69.8, 70.6) | 28.2 (27.5, 28.8) | 87.4 (87.0, 87.7) | 1.80 (1.75, 1.84)    | 0.66 (0.66, 0.67) |                      |
| ≥ 2             | 822/ 1672 (49.2%)                          | 8313/ 49343 (16.8%)      | 9.0 (8.4, 9.6)    | 98.0 (97.8, 98.1) | 49.2 (46.8, 51.6) | 83.2 (82.8, 83.5) | 4.43 (4.05, 4.85)    | 0.93 (0.93, 0.93) |                      |
| 3               | 85/ 112 (75.9%)                            | 9050/ 50903 (17.8%)      | 0.9 (0.7, 1.1)    | 99.9 (99.9, 100)  | 75.9 (68.0, 83.8) | 82.2 (81.9, 82.6) | 14.43 (9.37, 22.24)  | 0.99 (0.99, 0.99) |                      |
| <b>CRB-65</b>   |                                            |                          |                   |                   |                   |                   |                      |                   |                      |
| ≥ 0             | 9135/ 51015 (17.9%)                        | -                        | 100 (100, 100)    | 0 (0, 0)          | 17.9 (17.6, 18.2) | -                 | 1.00 (1.00, 1.00)    | -                 | 0.66<br>(0.65, 0.66) |
| ≥ 1             | 6996/ 26240 (23.9%)                        | 2139/ 21775 (9.8%)       | 76.6 (75.5, 77.5) | 46.9 (46.4, 47.4) | 23.9 (23.4, 24.4) | 90.2 (89.8, 90.6) | 1.44 (1.42, 1.46)    | 0.50 (0.48, 0.52) |                      |
| ≥ 2             | 2465/ 6267 (39.9%)                         | 6670/ 44748 (14.9%)      | 27.0 (26.1, 27.9) | 90.9 (90.6, 91.2) | 39.3 (38.1, 40.5) | 85.1 (84.8, 85.4) | 2.97 (2.84, 3.11)    | 0.80 (0.79, 0.81) |                      |
| ≥ 3             | 461/ 716 (64.4%)                           | 8674/ 50299 (17.2%)      | 5.0 (4.6, 5.5)    | 99.4 (99.3, 99.5) | 64.4 (60.1, 68.7) | 82.6 (82.4, 83.1) | 8.29 (7.16, 9.60)    | 0.96 (0.95, 0.96) |                      |
| 4               | 56/ 68 (82.4%)                             | 9079/ 50947 (17.8%)      | 0.61 (0.5, 0.8)   | 100 (100, 100)    | 82.4 (73.3, 91.4) | 82.2 (81.8, 82.5) | 21.39 (11.47, 39.89) | 0.99 (0.99, 1.00) |                      |
| <b>qSOFA-65</b> |                                            |                          |                   |                   |                   |                   |                      |                   |                      |
| ≥ 0             | 9135/ 51015 (17.9%)                        | -                        | 100 (100, 100)    | 0 (0, 0)          | 17.9 (17.6, 18.2) | -                 | 1.00 (1.00, 1.00)    | -                 | 0.67<br>(0.66, 0.67) |
| ≥ 1             | 7714/ 33706 (22.9%)                        | 1421/ 17309 (8.2%)       | 84.4 (83.7, 85.2) | 37.9 (37.5, 38.4) | 22.9 (22.4, 23.3) | 91.8 (91.4, 92.2) | 1.36 (1.34, 1.38)    | 0.41 (0.39, 0.43) |                      |
| ≥ 2             | 3467/ 9783 (35.4%)                         | 5668/ 41323 (13.7%)      | 38.0 (37.0, 38.2) | 84.9 (84.6, 85.3) | 35.4 (34.5, 36.4) | 86.3 (85.9, 86.6) | 2.51 (2.43, 2.61)    | 0.73 (0.72, 0.74) |                      |
| ≥ 3             | 634/ 1186 (53.5%)                          | 8501/ 49829 (17.1%)      | 6.9 (6.4, 7.5)    | 98.7 (98.6, 98.8) | 53.5 (49.6, 57.3) | 82.9 (82.6, 83.3) | 5.27 (4.73, 5.86)    | 0.94 (0.94, 0.95) |                      |
| 4               | 70/ 92 (76.1%)                             | 9065/ 50923 (17.8%)      | 0.8 (0.6, 0.9)    | 99.9 (99.9, 100)  | 76.1 (67.4, 84.8) | 82.2 (81.9, 82.5) | 14.59 (9.04, 23.54)  | 0.99 (0.99, 0.99) |                      |

**Table S14.** Performance measures of CRB, CRB-65, qSOFA and qSOFA-65 in terms of hospital mortality in the SARS-CoV-2 negative reduced cohort 1 (after excluding patients with chronically bedridden, admission from nursing home and palliative treatment goal). Number of cases are provided together with absolute and relative frequencies (n, %) of died patients.

| Score cut-off   | Outcome present (n/N, %) with score values |                          | Sensitivity [%]   | Specificity [%]   | PPV [%]           | NPV [%]           | Positive LR          | Negative LR       | AUC                  |
|-----------------|--------------------------------------------|--------------------------|-------------------|-------------------|-------------------|-------------------|----------------------|-------------------|----------------------|
|                 | Larger than or equal to the cut-off        | Smaller than the cut-off |                   |                   |                   |                   |                      |                   |                      |
| <b>CRB</b>      |                                            |                          |                   |                   |                   |                   |                      |                   |                      |
| ≥ 0             | 6766/ 111037 (6.1%)                        | -                        | 100 (100, 100)    | 0 (0, 0)          | 6.1 (6.0, 6.2)    | -                 | 1.00 (1.00, 1.00)    | -                 | 0.63<br>(0.63, 0.64) |
| ≥ 1             | 3216/ 27050 (11.9%)                        | 3550/ 83987 (4.2%)       | 47.5 (46.3, 48.7) | 77.1 (76.9, 77.4) | 11.9 (11.5, 12.3) | 95.8 (95.6, 95.9) | 2.08 (2.02, 2.14)    | 0.68 (0.67, 0.69) |                      |
| ≥ 2             | 821/ 3285 (25.0%)                          | 5945/ 107752 (5.5%)      | 12.1 (11.4, 12.9) | 97.6 (97.5, 97.7) | 25.0 (24.7, 25.3) | 94.5 (94.2, 94.8) | 5.13 (4.79, 5.51)    | 0.90 (0.89, 0.90) |                      |
| 3               | 121/ 274 (44.2%)                           | 6645/ 110763 (6.0%)      | 1.8 (1.5, 2.1)    | 99.9 (99.8, 99.9) | 44.2 (43.9, 44.5) | 94.0 (93.2, 94.8) | 12.19 (10.23, 14.52) | 0.98 (0.92, 1.06) |                      |
| <b>qSOFA</b>    |                                            |                          |                   |                   |                   |                   |                      |                   |                      |
| ≥ 0             | 6766/ 111037 (6.1%)                        | -                        | 100 (100, 100)    | 0 (0, 0)          | 6.1 (6.0, 6.2)    | -                 | 1.00 (1.00, 1.00)    | -                 | 0.64<br>(0.64, 0.65) |
| ≥ 1             | 4032/ 40580 (9.9%)                         | 2734/ 70457 (3.9%)       | 59.6 (58.4, 60.8) | 64.9 (64.7, 65.2) | 9.9 (9.6, 10.2)   | 96.1 (96.0, 96.3) | 1.70 (1.66, 1.74)    | 0.62 (0.61, 0.63) |                      |
| ≥ 2             | 1229/ 5566 (22.1%)                         | 5537/ 105471 (5.2%)      | 18.2 (17.2, 19.1) | 95.8 (95.7, 96.0) | 22.1 (21.6, 22.5) | 94.8 (94.5, 95.0) | 4.37 (4.14, 4.61)    | 0.85 (0.85, 0.86) |                      |
| 3               | 228/ 536 (42.5%)                           | 6538/ 110501 (5.9%)      | 3.4 (2.9, 3.8)    | 99.7 (99.7, 99.7) | 42.5 (42.2, 42.9) | 94.1 (93.4, 94.7) | 11.41 (10.11, 12.87) | 0.97 (0.93, 1.00) |                      |
| <b>CRB-65</b>   |                                            |                          |                   |                   |                   |                   |                      |                   |                      |
| ≥ 0             | 6766/ 111037 (6.1%)                        | -                        | 100 (100, 100)    | 0 (0, 0)          | 6.1 (6.0, 6.2)    | -                 | 1.00 (1.00, 1.00)    | -                 | 0.68<br>(0.67, 0.68) |
| ≥ 1             | 6352/ 84366 (7.5%)                         | 414/ 26787 (1.5%)        | 93.9 (93.3, 94.5) | 25.2 (24.9, 25.4) | 7.5 (7.4, 7.7)    | 98.4 (98.3, 98.6) | 1.25 (1.25, 1.26)    | 0.24 (0.23, 0.25) |                      |
| ≥ 2             | 2926/ 21978 (13.3%)                        | 3840/ 89175 (4.3%)       | 43.2 (42.1, 44.4) | 81.7 (81.5, 82.0) | 13.3 (12.9, 13.8) | 95.7 (95.5, 95.8) | 2.37 (2.30, 2.44)    | 0.69 (0.69, 0.70) |                      |
| ≥ 3             | 698/ 2689 (26.0%)                          | 6068/ 108464 (5.6%)      | 10.3 (9.6, 11.0)  | 98.1 (98.0, 98.2) | 26.0 (25.4, 26.5) | 94.4 (94.1, 94.7) | 5.40 (5.00, 5.83)    | 0.91 (0.91, 0.92) |                      |
| 4               | 101/ 217 (46.5%)                           | 6665/ 110936 (6.0%)      | 1.5 (1.2, 1.8)    | 99.9 (99.9, 99.9) | 46.5 (46.2, 46.9) | 94.0 (93.0, 94.9) | 13.42 (11.16, 16.14) | 0.99 (0.93, 1.05) |                      |
| <b>qSOFA-65</b> |                                            |                          |                   |                   |                   |                   |                      |                   |                      |
| ≥ 0             | 6766/ 111037 (6.1%)                        | -                        | 100 (100, 100)    | 0 (0, 0)          | 6.1 (6.0, 6.2)    | -                 | 1.00 (1.00, 1.00)    | -                 | 0.68<br>(0.68, 0.69) |
| ≥ 1             | 6498/ 89351 (7.3%)                         | 268/ 21686 (1.2%)        | 96.0 (95.6, 96.5) | 20.5 (20.3, 20.8) | 7.3 (7.1, 7.4)    | 98.8 (98.6, 98.9) | 1.21 (1.20, 1.21)    | 0.19 (0.19, 0.20) |                      |
| ≥ 2             | 3649/ 31137 (11.7%)                        | 3117/ 79900 (3.9%)       | 53.9 (52.7, 55.1) | 73.6 (73.4, 73.9) | 11.7 (11.4, 12.1) | 96.1 (95.9, 96.3) | 2.05 (2.00, 2.09)    | 0.63 (0.62, 0.63) |                      |
| ≥ 3             | 1073/ 4414 (24.3%)                         | 5693/ 106623 (5.3%)      | 15.9 (15.0, 16.7) | 96.8 (96.7, 96.9) | 24.3 (23.0, 25.6) | 94.7 (94.4, 94.9) | 4.95 (4.66, 5.25)    | 0.87 (0.86, 0.88) |                      |
| 4               | 188/ 421 (44.7%)                           | 6578/ 110616 (5.9%)      | 2.8 (2.4, 3.2)    | 99.8 (99.7, 99.8) | 44.7 (39.9, 49.4) | 94.1 (93.3, 94.8) | 12.43 (10.39, 14.88) | 0.97 (0.97, 0.98) |                      |

**Table S15.** Performance measures of CRB, CRB-65, qSOFA and qSOFA-65 in terms of mechanical ventilation in the SARS-CoV-2 negative reduced cohort 1 (after excluding patients with chronically bedridden, admission from nursing home and palliative treatment goal). Number of cases are provided together with absolute and relative frequencies (n, %) of ventilated patients.

| Score cut-off   | Outcome present (n/N, %) with score values |                          | Sensitivity [%]   | Specificity [%]   | PPV [%]           | NPV [%]           | Positive LR         | Negative LR       | AUC               |
|-----------------|--------------------------------------------|--------------------------|-------------------|-------------------|-------------------|-------------------|---------------------|-------------------|-------------------|
|                 | Larger than or equal to the cut-off        | Smaller than the cut-off |                   |                   |                   |                   |                     |                   |                   |
| <b>CRB</b>      |                                            |                          |                   |                   |                   |                   |                     |                   |                   |
| ≥ 0             | 9214/ 111037 (8.3%)                        | -                        | 100 (100, 100)    | 0 (0, 0)          | 8.3 (8.1, 8.5)    | -                 | 1.00 (1.00, 1.00)   | -                 | 0.62 (0.62, 0.63) |
| ≥ 1             | 4158/ 27050 (15.4%)                        | 5056/ 83987 (6.0%)       | 45.1 (44.1, 46.1) | 77.5 (77.3, 77.8) | 15.4 (14.9, 15.8) | 94.0 (93.8, 94.1) | 2.01 (1.96, 2.06)   | 0.71 (0.70, 0.71) |                   |
| ≥ 2             | 1104/ 3285 (33.6%)                         | 8110/ 107752 (7.5%)      | 12.0 (11.3, 12.6) | 97.9 (97.8, 97.9) | 33.6 (33.3, 34.0) | 92.5 (92.1, 92.8) | 5.59 (5.24, 5.97)   | 0.90 (0.89, 0.91) |                   |
| 3               | 140/ 274 (51.1%)                           | 9074/ 110763 (8.2%)      | 1.5 (1.3, 1.8)    | 99.9 (99.8, 99.9) | 51.1 (50.8, 51.4) | 91.8 (90.8, 92.8) | 11.55 (9.81, 13.59) | 0.99 (0.92, 1.05) |                   |
| <b>qSOFA</b>    |                                            |                          |                   |                   |                   |                   |                     |                   |                   |
| ≥ 0             | 9214/ 111037 (8.3%)                        | -                        | 100 (100, 100)    | 0 (0, 0)          | 8.3 (8.1, 8.5)    | -                 | 1.00 (1.00, 1.00)   | -                 | 0.65 (0.65, 0.66) |
| ≥ 1             | 5631/ 40580 (13.9%)                        | 3583/ 70457 (5.1%)       | 61.1 (60.1, 62.1) | 65.7 (65.4, 66.0) | 13.9 (13.5, 14.2) | 94.9 (94.8, 95.1) | 1.78 (1.75, 1.81)   | 0.59 (0.59, 0.60) |                   |
| ≥ 2             | 1550/ 5566 (27.8%)                         | 7664/ 105471 (7.3%)      | 16.8 (16.1, 17.6) | 96.1 (95.9, 96.2) | 27.8 (27.3, 28.3) | 92.7 (92.5, 93.0) | 4.27 (4.05, 4.49)   | 0.87 (0.86, 0.87) |                   |
| 3               | 255/ 536 (47.6%)                           | 8959/ 110501 (8.1%)      | 2.8 (2.4, 3.1)    | 99.7 (99.7, 99.8) | 47.6 (47.2, 47.9) | 91.9 (91.1, 92.6) | 10.03 (8.91, 11.28) | 0.98 (0.93, 1.02) |                   |
| <b>CRB-65</b>   |                                            |                          |                   |                   |                   |                   |                     |                   |                   |
| ≥ 0             | 9214/ 111037 (8.3%)                        | -                        | 100 (100, 100)    | 0 (0, 0)          | 8.3 (8.1, 8.5)    | -                 | 1.00 (1.00, 1.00)   | -                 | 0.60 (0.60, 0.60) |
| ≥ 1             | 7613/ 84366 (9.0%)                         | 1601/ 26671 (6.0%)       | 82.6 (81.9, 83.4) | 24.6 (24.4, 24.9) | 9.0 (8.8, 9.2)    | 94.0 (93.7, 94.3) | 1.10 (1.09, 1.11)   | 0.71 (0.69, 0.72) |                   |
| ≥ 2             | 3261/ 21978 (14.8%)                        | 5953/ 89059 (6.7%)       | 35.4 (34.4, 36.4) | 81.6 (81.4, 81.9) | 14.8 (14.4, 15.3) | 93.3 (93.1, 93.5) | 1.93 (1.87, 1.98)   | 0.79 (0.78, 0.80) |                   |
| ≥ 3             | 812/ 2689 (30.2%)                          | 8402/ 108348 (7.8%)      | 8.8 (8.2, 9.4)    | 98.2 (98.1, 98.2) | 30.2 (29.6, 30.8) | 92.2 (91.9, 92.6) | 4.78 (4.44, 5.15)   | 0.93 (0.92, 0.94) |                   |
| 4               | 96/ 217 (44.2%)                            | 9118/ 110820 (8.2%)      | 1.0 (0.8, 1.2)    | 99.9 (99.9, 99.9) | 44.2 (43.9, 44.6) | 91.8 (90.7, 92.9) | 8.77 (7.22, 10.65)  | 0.99 (0.93, 1.1)  |                   |
| <b>qSOFA-65</b> |                                            |                          |                   |                   |                   |                   |                     |                   |                   |
| ≥ 0             | 9214/ 111037 (8.3%)                        | -                        | 100 (100, 100)    | 0 (0, 0)          | 8.3 (8.1, 8.5)    | -                 | 1.00 (1.00, 1.00)   | -                 | 0.62 (0.62, 0.63) |
| ≥ 1             | 8169/ 89351 (9.1%)                         | 1045/ 21686 (4.8%)       | 88.7 (88.0, 89.3) | 20.3 (20.0, 20.5) | 9.1 (9.0, 9.3)    | 95.2 (94.9, 95.5) | 1.11 (1.10, 1.12)   | 0.56 (0.55, 0.57) |                   |
| ≥ 2             | 4331/ 31137 (13.9%)                        | 4883/ 79900 (6.1%)       | 47.0 (46.0, 48.0) | 73.7 (73.4, 73.9) | 13.9 (13.5, 14.3) | 93.9 (93.7, 94.1) | 1.79 (1.75, 1.83)   | 0.72 (0.71, 0.73) |                   |
| ≥ 3             | 1144/ 4414 (25.9%)                         | 8070/ 106623 (7.6%)      | 12.4 (11.7, 13.1) | 96.8 (96.7, 96.9) | 25.9 (24.6, 27.2) | 92.4 (92.1, 92.7) | 3.87 (3.64, 4.10)   | 0.90 (0.90, 0.91) |                   |
| 4               | 172/ 421 (40.9%)                           | 9042/ 110616 (8.2%)      | 1.9 (1.6, 2.1)    | 99.8 (99.7, 99.8) | 40.9 (36.2, 45.6) | 91.8 (91.0, 92.7) | 7.63 (6.36, 9.16)   | 0.98 (0.97, 0.99) |                   |

**Table S16.** Performance measures of CRB, CRB-65, qSOFA and qSOFA-65 in terms of combined endpoint hospital mortality and/ or mechanical ventilation in the SARS-CoV-2 negative reduced cohort 1 (after excluding patients with chronically bedridden, admission from nursing home and palliative treatment goal). Number of cases are provided together with absolute and relative frequencies (n, %) of died and/ or ventilated patients.

| Score cut-off   | Outcome present (n/N, %) with score values |                          | Sensitivity [%]   | Specificity [%]   | PPV [%]           | NPV [%]           | Positive LR          | Negative LR       | AUC                  |
|-----------------|--------------------------------------------|--------------------------|-------------------|-------------------|-------------------|-------------------|----------------------|-------------------|----------------------|
|                 | Larger than or equal to the cut-off        | Smaller than the cut-off |                   |                   |                   |                   |                      |                   |                      |
| <b>CRB</b>      |                                            |                          |                   |                   |                   |                   |                      |                   |                      |
| ≥ 0             | 13339/ 111037 (12.0%)                      | -                        | 100 (100, 100)    | 0 (0, 0)          | 12.0 (11.8, 12.2) | -                 | 1.00 (1.00, 1.00)    | -                 | 0.62<br>(0.62, 0.63) |
| ≥ 1             | 5929/ 27050 (21.9%)                        | 7410/ 83987 (8.8%)       | 44.4 (43.6, 45.3) | 78.4 (78.1, 78.6) | 21.9 (21.4, 22.4) | 91.2 (91.0, 91.4) | 2.06 (2.01, 2.10)    | 0.71 (0.70, 0.71) |                      |
| ≥ 2             | 1456/ 3285 (44.3%)                         | 11883/ 107752 (11.0%)    | 10.9 (10.4, 11.4) | 98.1 (98.0, 98.2) | 44.3 (44.0, 44.7) | 89.0 (88.6, 89.4) | 5.83 (5.48, 6.21)    | 0.91 (0.90, 0.91) |                      |
| 3               | 190/ 274 (69.3%)                           | 13149/ 110763 (11.9%)    | 1.4 (1.2, 1.6)    | 99.9 (99.9, 99.9) | 69.3 (69.0, 69.6) | 88.1 (87.0, 89.3) | 16.57 (14.40, 19.06) | 0.99 (0.92, 1.05) |                      |
| <b>qSOFA</b>    |                                            |                          |                   |                   |                   |                   |                      |                   |                      |
| ≥ 0             | 13339/ 111037 (12.0%)                      | -                        | 100 (100, 100)    | 0 (0, 0)          | 12.0 (11.8, 12.2) | -                 | 1.00 (1.00, 1.00)    | -                 | 0.64<br>(0.64, 0.65) |
| ≥ 1             | 7870/ 40580 (19.4%)                        | 5469/ 70457 (7.8%)       | 59.0 (58.2, 59.8) | 66.5 (66.2, 66.8) | 19.4 (19.0, 19.8) | 92.2 (92.0, 92.4) | 1.76 (1.73, 1.79)    | 0.62 (0.61, 0.62) |                      |
| ≥ 2             | 2165/ 5566 (38.9%)                         | 11174/ 105471 (10.6%)    | 16.2 (15.6, 16.9) | 96.5 (96.4, 96.6) | 38.9 (38.3, 39.4) | 89.4 (89.1, 89.7) | 4.66 (4.44, 4.89)    | 0.87 (0.86, 0.87) |                      |
| 3               | 354/ 536 (66.0%)                           | 12985/ 110501 (11.8%)    | 2.7 (2.4, 2.9)    | 99.8 (99.8, 99.8) | 66.0 (65.7, 66.4) | 88.2 (87.4, 89.1) | 14.25 (12.90, 15.74) | 0.98 (0.93, 1.02) |                      |
| <b>CRB-65</b>   |                                            |                          |                   |                   |                   |                   |                      |                   |                      |
| ≥ 0             | 13339/ 111037 (12.0%)                      | -                        | 100 (100, 100)    | 0 (0, 0)          | 12.0 (11.8, 12.2) | -                 | 1.00 (1.00, 1.00)    | -                 | 0.63<br>(0.62, 0.63) |
| ≥ 1             | 11578/ 84366 (13.7%)                       | 1761/ 26671 (6.6%)       | 86.8 (86.2, 87.4) | 25.5 (25.2, 25.8) | 13.7 (13.5, 14.0) | 93.4 (93.1, 93.7) | 1.17 (1.16, 1.17)    | 0.52 (0.51, 0.53) |                      |
| ≥ 2             | 4949/ 21978 (22.5%)                        | 8390/ 89059 (9.4%)       | 37.1 (36.3, 37.9) | 82.6 (82.3, 82.8) | 22.5 (22.0, 23.1) | 90.6 (90.4, 90.8) | 2.13 (2.08, 2.18)    | 0.76 (0.76, 0.77) |                      |
| ≥ 3             | 1147/ 2689 (42.7%)                         | 12192/ 108348 (11.3%)    | 8.8 (8.1, 9.1)    | 98.4 (98.3, 98.5) | 42.7 (42.0, 43.3) | 88.7 (88.3, 89.2) | 5.45 (5.08, 5.84)    | 0.93 (0.92, 0.93) |                      |
| 4               | 143/ 217 (65.9%)                           | 13196/ 110820 (11.9%)    | 1.1 (0.9, 1.2)    | 99.9 (99.9, 99.9) | 65.9 (65.6, 66.2) | 88.1 (86.8, 89.4) | 14.15 (12.08, 16.59) | 0.99 (0.93, 1.06) |                      |
| <b>qSOFA-65</b> |                                            |                          |                   |                   |                   |                   |                      |                   |                      |
| ≥ 0             | 13339/ 111037 (12.0%)                      | -                        | 100 (100, 100)    | 0 (0, 0)          | 12.0 (11.8, 12.2) | -                 | 1.00 (1.00, 1.00)    | -                 | 0.65<br>(0.64, 0.65) |
| ≥ 1             | 12177/ 89351 (13.6%)                       | 1162/ 21686 (5.4%)       | 91.3 (90.8, 91.8) | 21.0 (20.8, 21.3) | 13.6 (13.4, 13.9) | 94.6 (94.3, 94.9) | 1.16 (1.15, 1.16)    | 0.41 (0.41, 0.42) |                      |
| ≥ 2             | 6465/ 31137 (20.8%)                        | 6874/ 79900 (8.6%)       | 48.5 (47.6, 49.3) | 74.7 (74.5, 75.0) | 20.8 (20.3, 21.2) | 91.4 (91.2, 91.6) | 1.92 (1.88, 1.96)    | 0.69 (0.68, 0.70) |                      |
| ≥ 3             | 1726/ 4414 (39.1%)                         | 11613/ 106623 (10.9%)    | 12.9 (12.4, 13.5) | 97.2 (97.1, 97.4) | 39.1 (37.7, 40.5) | 89.1 (88.7, 89.5) | 4.70 (4.46, 4.96)    | 0.90 (0.89, 0.90) |                      |
| 4               | 263/ 421 (62.5%)                           | 13076/ 110616 (11.8%)    | 2.0 (1.7, 2.2)    | 99.8 (99.8, 99.9) | 62.5 (57.8, 67.1) | 88.2 (87.2, 89.2) | 12.19 (10.10, 14.71) | 0.98 (0.97, 0.99) |                      |
